# Supplementary material
Source: PubMed Central journal article supplement (PMC2790168)
Supplement: NIHMS158223-supplement-01.pdf [file NIHMS158223-supplement-01.pdf]

## Supplemental Data

### Regulation of MBK-2/DYRK by CDK-1 and the Pseudophosphatases EGG-4 and EGG-5 during the Oocyte-to-Embryo Transition

Ken Chih-Chien Cheng, Richard Klancer, Andrew Singson, and Geraldine Seydoux

#### Figure S1: DYRK alignments

Alignment of DYRK2 from human (AAH06375), *Drosophila* (NP\_523564 Smell impaired isoform A) and *C. elegans* (F49E11.1a). Kinase domain is in bold. Subdomains are colored. All TP and SP motifs are highlighted. TP motif at 470 in *C. elegans* MBK-2 is not required for phosphorylation by hCdk1 *in vitro* assay (data not shown).

#### Figure S2: The amino-terminal domain of MBK-2 is phosphorylated *in vivo*.

(A) GFP:MBK-2(1-109) was immunoprecipitated from worms and western blotted with an anti-GFP antibody. CIP denotes treatment of the IP with Calf alkaline phosphatase, *cdk-1(RNAi)* denotes treatment of the worms with feeding RNAi.

(B) Same as in A, except that the worms were harvested as gravid hermaphrodites with 4 or more embryos in their uteri (adults) or as younger hermaphrodites with 0-1 embryos in their uteri (late L4-young adults).

#### Figure S3: Localization and expression of GFP:MBK-2 transgenes

(A) Gonads of live hermaphrodites expressing GFP:MBK-2 wild-type, K196R, S68A, S68E and activation loop (Y325F, Y327F) mutants. Western showing that the transgenic proteins are expressed at similar levels.

(B) Immunoprecipitation showing that GFP:MBK-2(WT), S68A and S68E interact with EGG-4/5 with similar affinities. Transgenic proteins were immunoprecipitated from whole worm extracts using anti-GFP antibody. Immunoprecipitates were run on a NuPAGE 4-12% gel, and Western blotted with anti-EGG-4/5 antibody. Input is 1/100<sup>th</sup> of the IP.

#### Figure S4: S68 is not required for MBK-2 activity when expressed in *E. coli*

MBP:MBK-2 fusions were partially purified from *E. coli* on amylose resin. Relative kinase activity was calculated by measuring <sup>32</sup>P incorporation in MEI-1, expressed as a ratio over the signal obtained for wild-type MBP:MBK-2 at 60 min (set to 1). In the case of Cdk1 addition, MBP:MBK-2 was pre-incubated with hCdk1 and cold ATP in kinase buffer for 30 min (same conditions as in Fig. 2A), before washing and performing the kinase assay on MEI-1 as above. Error bars represent standard deviation from 3 independent experiments. We do not know how the activity of *E. coli*-made MBP:MBK-2 compares to that of MBK-2 immunoprecipitated from worm or mammalian cells.

#### Figure S5: EGG proteins contain a PTP domain.

Alignment of EGG-3, EGG-4, EGG-5 and the human phosphatase PTN7. The PTP domain is highlighted in bold. Phosphatase active site is pink and putative destruction

boxes (RXXL) are green. The first two RXXL motifs in EGG-3 are required for degradation *in vivo* (Stitzel et al., 2007).

**Figure S6: EGG-4/5 are required to inhibit MBK-2 in metaphase of meiosis I and co-localize with EGG-3 on subcortical puncta.**

A. *egg-4/5(RNAi)* zygote in metaphase of meiosis I co-stained for P-MEI-1 and DAPI.

B. Western blot of whole worm extracts blotted with anti-MBK-2 and anti-EGG-4/5 sera. Predicted molecular weights of EGG-4 and MBK-2 are 83 kDa and 55 kD, respectively.

C. Zygote in Meiosis II co-stained with DAPI (DNA), anti-EGG-3 and anti-EGG-4. Two sections are shown: one near the cortex and one near the center of the embryo (cytoplasm). At this stage, EGG-3 appears on puncta throughout the embryo. In contrast, EGG-4 appears on puncta near the cortex and around the sperm pronucleus (right most signal in cytoplasm section), but less so in the cytoplasm.

**Figure S7: EGG-3 uses its phosphatase domain to interact with the amino-terminus of MBK-2.**

Extracts from *E. coli* expressing the indicated FLAG-tagged MBK-2 or EGG-3 fusions were pulled down with glutathione-sepharose beads coupled to the indicated GST-tagged MBK-2 or EGG3 fusions and immunoblotted with an anti-FLAG antibody. Input is 1/50<sup>th</sup> of the pull-down. EGG-3(237-513) is phosphatase domain, MBK-2(1-166) is amino-terminus, MBK-2(166-508) is the kinase domain (see Sup. Figs. 1 and 5).

**Figure S8: EGG-4 inhibits MBK-2 kinase activity in a dose-dependent manner**

Indicated molar excess of FLAG-tagged EGG-3, EGG-4 and EGG-4(H599A,G603A, R606A) were added to MBP:MBK-2 kinase reactions and the amount of P-MEI-1 was quantified after 30 minutes (as in Fig. 3). Levels are expressed as percentage of P-MEI-1 observed with MBP:MBK-2 alone (first lane, set to 100%).

# Supplementary Figure 1

```

DYRK2Hs -----MNDHLHVGSHA-----HGQIQVQQLFE 22
DYRK2Ce -----MTLFEPSTSGNRMGYRGSSNSSSGVSGG-----SGSLMTQSIG- 39
DYRK2Dm MLDRCEMPIQLDNEKLRDVRSLSGSRLDLPQLCNGSRRLDGHNNHVAANENTVTTTSLNG 60
          * . . . . .
          Serine/Threonine-rich region
DYRK2Hs DNSNKRIVLTTQPNGL-----TTVGKTPGLPVVPERQLDSIHRRQGSSTSLKSMEGMGK-V 76
DYRK2Ce -GPNKHLASHSSTLNT-----ASTHDMHHSKIPKSPNESLSRSHSTSSGGSQGGHNS-N 92
DYRK2Dm NGNGNGNSNSNNNNNIGSPVSSSTTNSSNGGNERGSSTKNSSSSGSSGNSASSTGSGE 120
          . . . . . * . . . . .
          DYRK homo-
DYRK2Hs KATP--MTPEQAMKOYMQKLTAFAEHHEIFSYPEIYFLGLNAK---RQGMTGGPNNGGYD 131
DYRK2Ce SGNSTGFRPEDAVQTFGAKLVPEFEKNEYNYTRVFFVGVSHAKK---QAGVIGGANNNGGYD 149
DYRK2Dm LKCNTPTMPSLKVKKFRNYLTDLEFELKLVYKEVWYFGQHASKNYNKPAPTANTTNLGYD 180
          : * . : : * . * . * : * . . . . * * *
          logy domain ATP binding domain
DYRK2Hs DDQGSYVQVPHDHVAYRYEVLKVIKGGSGGQVVKAYDHKVHQHVALKMRNEKRFHRQAA 191
DYRK2Ce DENGSYQLVVDHDIAYRYEVLKVIKGGSGGQVVKAFDHYKQYVALKLVNEKRFHRQAD 209
DYRK2Dm DDNGNYKIIIEHDHIAFRYEILEVIGKGGSGGQVIRALDHKTNTHVAIKIIRNKRFLNQAV 240
          * : * . * : * * : * * : * * * * * : * * * : * * : * * * * *
          EEIRILEHLRKQDKDNTMNVIHMLENFTFRNHICMTFELLSMNLyelIKKFKQGFSLPL 251
          DYRK2Ce EEIRILDHLRRQDSGDGTHNIIHMLDYFNFRNHKCI TFELLSINLYELIKRNFQGFSLML 269
          DYRK2Dm VELNILDDELREKADGSHNVIHMLDYTYFRKHLCI TFELMSLNLyelIKKNNYNGFSMSL 300
          * : * * : * * : * * : * * : * * : * * : * * : * * : * * : *
          Catalytic loop Activation loop
DYRK2Hs VRKFAHSILOCLDALHKNRIHCDLKPENILLKQGRSGIKVIDFGSSCYEHQRVYTYIQ 311
DYRK2Ce VRKFAYSMLLCLDLLQKNRLIHC DLKPE NVLLKQGRSGIKVIDFGSSCFDDQRIYTYIQ 329
DYRK2Dm IRRFCNSIVKCLRLLYKENIHC DLKPE NVLLKQGRSSSIKVIDFGSSCYVDRKIYTYIQ 360
          : * . * . * : * * * * * : * * * * * : * * * * * : * * * * *
          SRFYRAPEVILGARYGMPIDMWSLGCILAELLTGYPLLPGEDEGDQLACMIELLGMPSQK 371
          DYRK2Ce SRFYRAPEVILGTYGMPIDMWSLGCILAELLTGYPLLPGEDENDQLALIELLGMPPPK 389
          DYRK2Dm SRFYRSPEVILGLQYGTAIMWSLGCILAELYTGFLPFGENEVEQLACIMEVLGLPPKV 420
          * * * * * : * * . * * * * * * * * * * * * * * * * * * * * *
          LLDAKRAKNFVSSKGYPRYCTVTTLSDGSVVLNNGRSRRGKLRGPPESREWGNAKGC 431
          DYRK2Ce SLETAKRARTFITSKGYPRYCTATSMPDGSSVVLAGARSKRGKMRGPPASRSWSTALKNMG 449
          DYRK2Dm LISVARRRRLFFDSRDAPRCITNT-----KGRKR-SFGSKSLAHLH-CQ 463
          : . . . : * . * . * * * * * * * * * * * * * * * * *
          DPLFLDFLQCLEWDPVAVRMTPGQALRHPWLRRLPK----- 468
          DYRK2Ce DELFVDFLKRCLDWDPETRMTPAQALKHKWLRRLPN----- 486
          DYRK2Dm DRFYIDFLQCLEWDPVAVRMTPEAAHHEFLQPSASSRHRSCRMSSSSSSGLNSVSQKS 523
          * * * * * : * * : * * * * * * * * * * * * *
          -----PPTGEKTSVKRITESTGAITSISKLPPSSSASKLRTN-----LA 508
          DYRK2Ce -----PPRDGLESMGGLADHEVCFIIF----- 508
          DYRK2Dm SCYSFSEISPGTNGPVVASITSTTAVHNAAIATTTKSRQPPSQSHGHAQSNGLPDIKL 583
          * * * * * : * * : * *
          QMTDANGNIQORTVLPKLV----- 528
          DYRK2Ce ----- 528
          DYRK2Dm SASDKYNSMQKVAVRSKITSSVSDLESVQYSLHRIYGGVSGSTHHVSSAATRKHLPGT 643
          -----
          DYRK2Hs -----
          DYRK2Ce -----
          DYRK2Dm GSGIVGAMSSKYGSSTLAHNHNHNVTHHNASTATIATTHHHHHHGGQQQQSSSGASTMA 703
          -----
          DYRK2Hs -----
          DYRK2Ce -----
          DYRK2Dm MSHSQSTGDVSDRAIFGRA 722

```

# Supplementary Figure 2

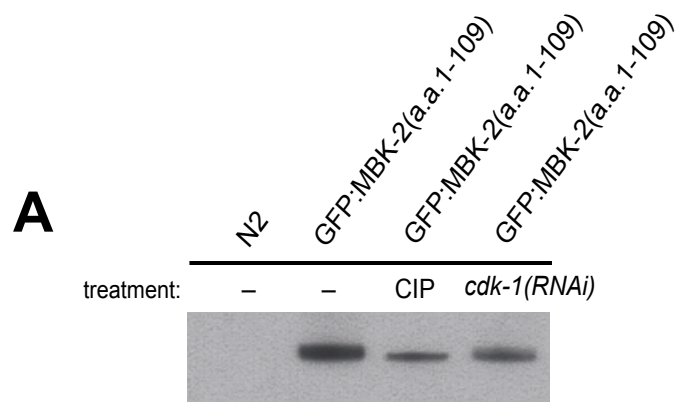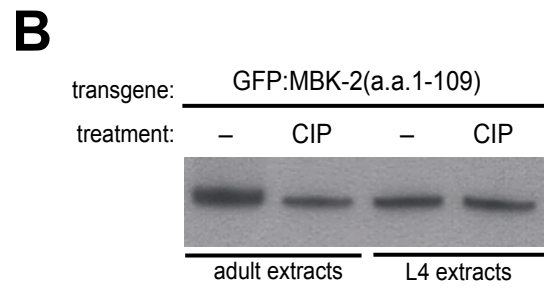



# Supplementary Figure 3

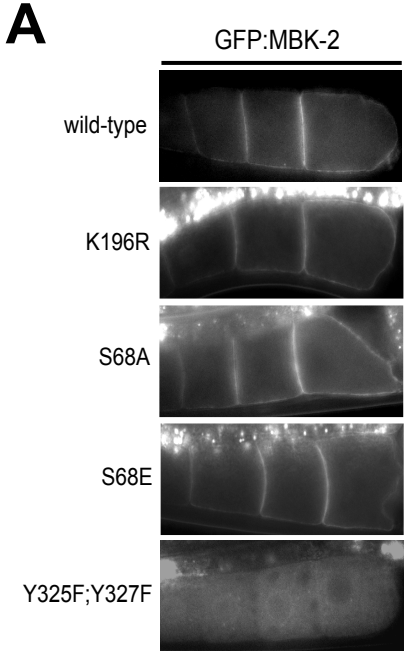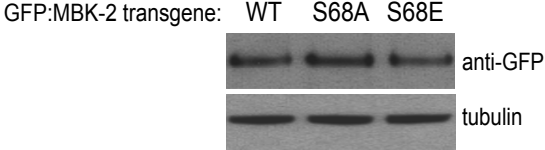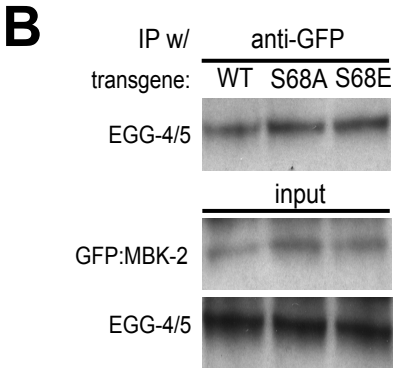

# Supplementary Figure 4

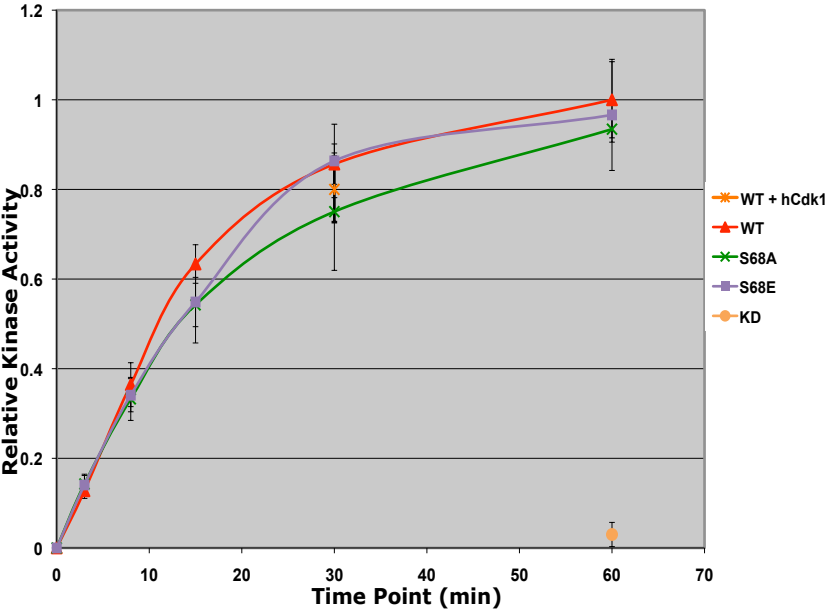

## Supplementary Figure 5

```

EGG-4Ce      MALNSEVMFREQINAMRSQAGRKRATSLQSFCSGNTDDSSADSTDNDMMVDYPQQKGV 60
EGG-5Ce      MALNSEVMFREQINAMRSQAGRKRATSLQSFCSGNTDDSSADSTDNDMMVDYPQQKGV 60
EGG-3Ce      -----MRTSDSHLPLSNLARSDSIE 20
PTPN7Hs      -----

EGG-4Ce      CMRARFNSESTLSKSFRRKVKKLAQKDRRSKERLNGNSEEDAIEVPRGAPSTYAAPSKLR 120
EGG-5Ce      CMRARFNSESTLSKSFRRKVKKLAQKDRRSKERLNGNSEEDAIEVPRGAPSTYAAPSKLR 120
EGG-3Ce      FKDAVIN-EKVVHSANRRKGLTPKAPEKKSQWFGGQKSEEELLMER-----VEQH 70
PTPN7Hs      -----

EGG-4Ce      KSKALDCLVSEKPKDEGRREDSGHGAD IEMAKGHFNVRMKVFAARTAMQVEPALVMKTR 180
EGG-5Ce      KSKALDCLVSEKPKDEGRSEDSGHGAD IEMAKGHFNVRMKVFAARTAMQVEPALVMKTR 180
EGG-3Ce      ELEELQTFIAQK-----LFRVDGIICDEETRILLVE 101
PTPN7Hs      -----MVQAHGGRSRAQPLTSLG 19
                                     : . . . :

EGG-4Ce      KALEMKNVAVLENHQSPGAFSLHAAYKIAASAESR-VGSITPCNKVTKTEAMANLIRSSYD 239
EGG-5Ce      KALEMKNVAVLENHQSPGAFSLHAAYKIAASAESR-VGSITPCNKVTKTEAMANLIRSSYD 239
EGG-3Ce      KLMNAKEYPTINHD---ELAHRYGSSMAGWLRDR-LVPSMSDCSSVLQRAAEFYQNKMS 157
PTPN7Hs      AAMTQPPPEKTPAKKHVRLQERRGNSVALMLDVRSLGAVEPICSVNTPREVTLHFLRTAG 79
                                     : . . . :

EGG-4Ce      DTEITQELLFSSKFDTKWKGRYTDIYMRDENGKKPKRPVNGQGWVPLKSIKFKFGINS 299
EGG-5Ce      DTEITQELLFSSKFDTKWKGRYTDIYMRDENGKKPKRPVNGQGWVPLKSIKFKFGINS 299
EGG-3Ce      DPLCNWQQLNP-----EHVSMVA 175
PTPN7Hs      HPLTRWALQRQ----- 90
                                     ..

EGG-4Ce      TFFTNRHIDLKSARDQVLLMRLLSHDQTSTWISDIHPEAVKNETMAEYLLRELDASTMQK 359
EGG-5Ce      TFFTNRHIDLKSARDQVLLMRLLSHDQTSTWISDIHPEAVKNETLAEYLLRELDASTMQK 359
EGG-3Ce      ARIAKFSEEMS---SKVKWLLVEPGKFSCHLTFVQEFNR---LDRMFVSNELSDDES 228
PTPN7Hs      -----PPSPKLEEEFLKIPSNFVS-----PEDLDIPGH 119
                                     . : . : : : : : :

EGG-4Ce      RVQAFKANVLADRDRVRVAGQFYNNIRIGKRMFGAARKAKYLSTIIGMERRFEILENSV 419
EGG-5Ce      RVQAFKANVLADRDRVRVAGQFYNNIRIGKRMFGAARKAKYLSTIIGMERRFEILENSV 419
EGG-3Ce      LQAFNANYLTKARSKMVPCAEFSRVKLN---GLGRLLDRNELRNGMFSDEHEFLQEEG 285
PTPN7Hs      ASKDRYKTIPLNPQSRVCLGRAQS-----QEDG 147
                                     . * . . . : : :

EGG-4Ce      NHIPFTHSASDNNQEKCRNPRVHCKDSTRIALQFPRGQYLGDFFIHANRISGKP-LFNEFI 478
EGG-5Ce      NHIPFTHSASDNNQEKCRNPRVHCRDSTRIALQFPRGQYLGDFFIHANRISGKP-LFNEFI 478
EGG-3Ce      YTAKSTYGT-----DFIHANYVKGGP-LLNTFI 313
PTPN7Hs      -----DYINANYIRGYDGKEKVI 166
                                     * : * : * : * :

EGG-4Ce      MTQAPMKNTVDDFWRMVWQEEVPIVMLTSRKEP-----ERCEYYWPKSPSDPA 527
EGG-5Ce      MTQAPMKNTVDDFWRMVWQEEVPIVMLTSRKEP-----ERCEYYWPKSPSDPA 527
EGG-3Ce      CAQAPLKNTQEDFWRMVVQEKQFIVMLNSAVDSSTLGPLDSANRNHCPYYPRAENE-- 371
PTPN7Hs      ATQGPMPNTVSDFWEMVWQEEVSLIVMLTQLREG-----KEKCVHYWPTEET-- 214
                                     : * : * * . * : * : * : * :

EGG-4Ce      VTVPGLRIENFGVYQAPDPLFRVTHLRLIGPD-----REERHVEHWQGDVNNSSNM 579
EGG-5Ce      VTVPGLRIENFGVYQAPDPLFRVTHLRLIGPD-----REERHVEHWQGDVNNSSNM 579
EGG-3Ce      SLRFGSFHITCMKVDKADPLFTITLKVQKVGGNLLDAEFDEELFLEHWQWDWQYLGDV 431
PTPN7Hs      ---YGFQIRIQDMKECEPYTVRQLTIQYQEE-----RSVKHILFSAWPDHQTPES 263
                                     * : * : . . : : : : : :

EGG-4Ce      YSPLNLRLLRNAS-----KPVVIHDHLGVSRAACLVAEIAICSLLRG-PTYKYPVQ 631
EGG-5Ce      YSPLNLRLLRNAS-----KPVVIHDHLGVSRAACLVAEIAICSLLRG-PTYKYPVQ 631
EGG-3Ce      HWPFRVLRKARQLS-----TPTIVQCIDGCSKSGTLVSIETALMHFIRGSPITKSLIL 484
PTPN7Hs      AGPLLRVAVEEESPEAAHPGPIVHCSAGIGRTGCFIATRIGCQQLKAR---GEVDIL 320
                                     * : * : * : * : : : : : : :
consensus: HCSAGXGRXG

```

EGG-4Ce           **RAVQFLRQRRPFSIETPMQYIFVHRLVAFFFRDVI**GSAKELDVDYERWLQERSE**RMFL**DD 691  
 EGG-5Ce           **RAVQFLRQRRPFSIETPMQYIFVHRLVAFFFRDVI**GSAKELDVDYERWLQERSE**RMFL**DD 691  
 EGG-3Ce           **QSCV**FVRLQRRLSVSSVLLYLF**IYRVILRWIE**PYVNK**WYHRAAL**GLRFK**SIG----**FIQK 540  
 PTPN7Hs           **GIVCQLRLDRGGMIQTAEQYQFLHHTLALYAGQLPEEP**S----- 360  
                   :\* \*    :: \* \*::: : :    .

EGG-4Ce           LAAPIPGYRLLSPRADPDIVRMVGRPERPNYRREAPDCVGEMPNKVATVDGILSPAKSVF 751  
 EGG-5Ce           LAAPIPGYRLLSPRADPDIVRMVGRPERPNYRREAPDCVGEMPNKVAAVD**GILSPAKSVF** 751  
 EGG-3Ce           YNAMIQEFSRITPAY----- 555  
 PTPN7Hs           -----

EGG-4Ce           EF 753  
 EGG-5Ce           EF 753  
 EGG-3Ce           --  
 PTPN7Hs           --

# Supplementary Figure 6

## A

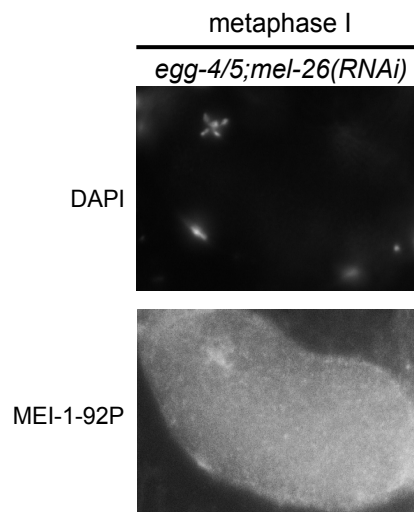

## B

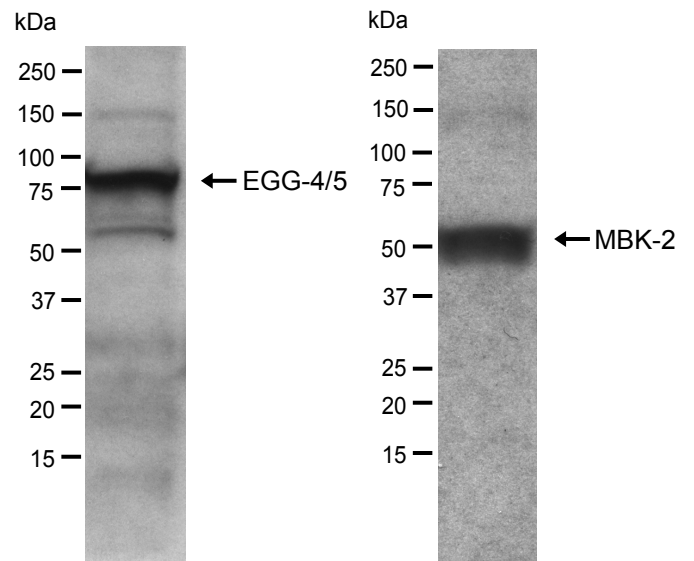

## C

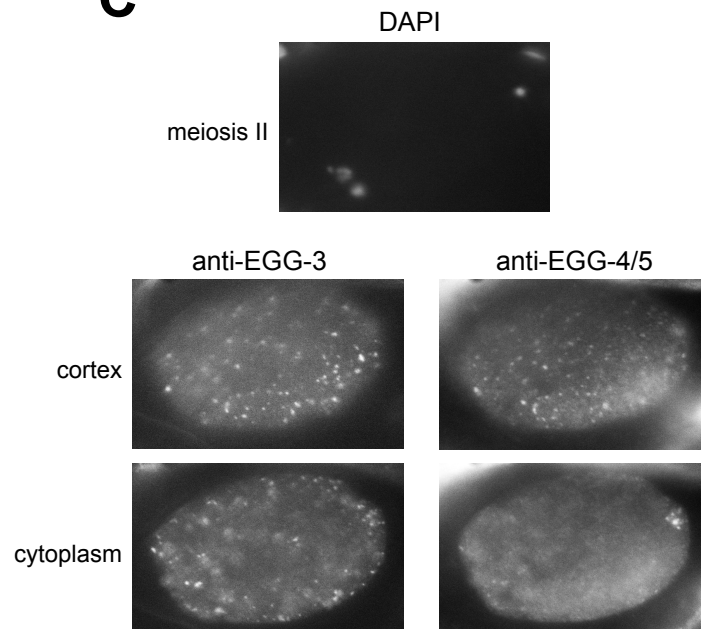

# Supplementary Figure 7

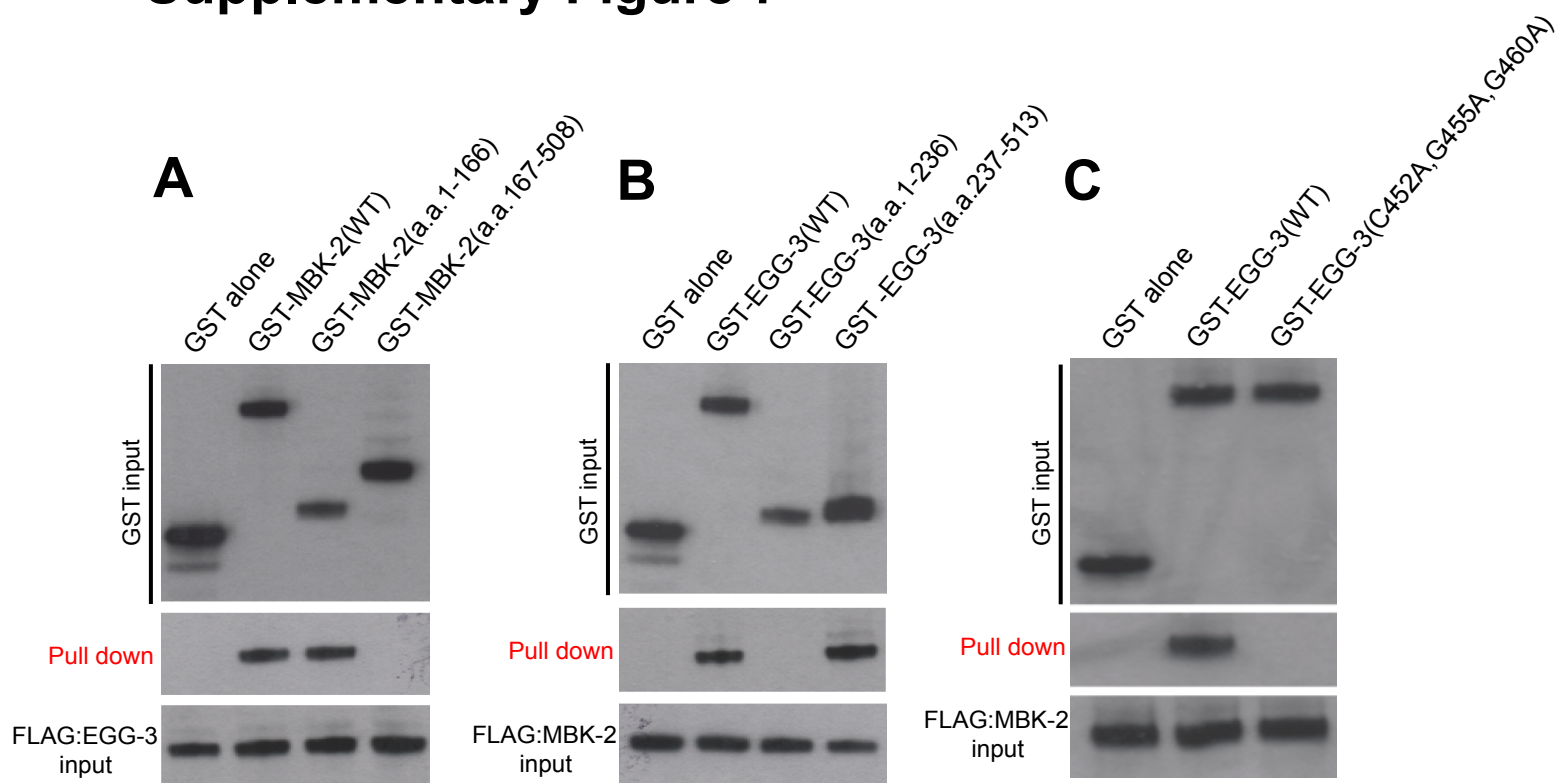

# Supplementary Figure 8

|                               |   |    |    |    |    |    |
|-------------------------------|---|----|----|----|----|----|
| MBP:MBK-2                     | + | +  | +  | +  | +  | +  |
| FLAG:EGG-3                    | - | -  | 8X | -  | -  | -  |
| FLAG:EGG-4(H599A,G603A,R606A) | - | 8X | -  | -  | -  | -  |
| FLAG:EGG-4                    | - | -  | -  | 2X | 4X | 8X |

$P^{32}$



(%) 100 67.3 88.7 47.4 29.3 19.9

| transgene           | genotype                                                            | (%) gonads                         |                                     |                                     |                                     |
|---------------------|---------------------------------------------------------------------|------------------------------------|-------------------------------------|-------------------------------------|-------------------------------------|
|                     |                                                                     | with 0 oocyte positive for P-MEI-1 | with 2 oocytes positive for P-MEI-1 | with 3 oocytes positive for P-MEI-1 | with 4 oocytes positive for P-MEI-1 |
| –                   | <i>mel-26(RNAi)</i><br>(n=10)                                       | 100%                               | 0%                                  | 0%                                  | 0%                                  |
| –                   | <i>egg-3(tm1191)</i><br>(n=11)                                      | 100%                               | 0%                                  | 0%                                  | 0%                                  |
| –                   | <i>mel-26(RNAi);<br/>egg-3(tm191)</i><br>(n=16)                     | 100%                               | 0%                                  | 0%                                  | 0%                                  |
| –                   | <i>mel-26(RNAi);<br/>egg-4/5(RNAi)</i><br>(n=65)                    | 86.2%                              | 13.8%                               | 0%                                  | 0%                                  |
| –                   | <i>mel-26(RNAi);<br/>egg-3(tm1191);<br/>egg-4/5(RNAi)</i><br>(n=32) | 87.5%                              | 12.5%                               | 0%                                  | 0%                                  |
| GFP:MBK-2<br>(WT)   | <i>mel-26(RNAi)</i><br>(n=18)                                       | 100%                               | 0%                                  | 0%                                  | 0%                                  |
| GFP:MBK-2<br>(WT)   | <i>mel-26(RNAi);<br/>egg-3(RNAi)</i><br>(n=14)                      | 100%                               | 0%                                  | 0%                                  | 0%                                  |
| GFP:MBK-2<br>(WT)   | <i>mel-26(RNAi);<br/>egg-4/5(RNAi)</i><br>(n=41)                    | 7.3%                               | 68.3%                               | 22%                                 | 2.4%                                |
| GFP:MBK-2<br>(S68E) | <i>mel-26(RNAi)</i><br>(n=21)                                       | 100%                               | 0%                                  | 0%                                  | 0%                                  |
| GFP:MBK-2<br>(S68E) | <i>mel-26(RNAi);<br/>egg-3(RNAi)</i><br>(n=18)                      | 100%                               | 0%                                  | 0%                                  | 0%                                  |
| GFP:MBK-2<br>(S68E) | <i>mel-26(RNAi);<br/>egg-4/5(RNAi)</i><br>(n=37)                    | 0%                                 | 24.3%                               | 43.2%                               | 32.4%                               |
| GFP:MBK-2<br>(S68A) | <i>mel-26(RNAi);<br/>mbk-2(pk1427);<br/>egg-4/5(RNAi)</i><br>(n=21) | 100%                               | 0%                                  | 0%                                  | 0%                                  |

**Table S1: % gonads with 0,1,2,3 or more oocytes positive for P-MEI-1**



| Table S2: Strains Used in This Study |                                                                        |                                                                        |                             |          |
|--------------------------------------|------------------------------------------------------------------------|------------------------------------------------------------------------|-----------------------------|----------|
| Name                                 | Description                                                            | Genotype                                                               | Reference                   | Note     |
| JH1576                               | pie-1prom:GFP:MBK-2                                                    | <i>unc-119(ed3);axls1140[pJP1.02]</i>                                  | Pellettieri et al, 2003     |          |
| JH1714                               | pie-1prom:GFP:MBK-2(K196R)                                             | <i>unc-119(ed3);axls1227[pJP1.08]</i>                                  | Pellettieri et al, 2003     |          |
| JH2298                               | pie-1prom:GFP:MBK-2(S68A)                                              | <i>unc-119(ed3);axls</i>                                               | this study                  |          |
| JH2300                               | pie-1prom:GFP:MBK-2(S68E)                                              | <i>unc-119(ed3);axls</i>                                               | this study                  |          |
| JH1872                               | pie-1prom:GFP:MBK-2(Y325FY327F)                                        | <i>unc-119(ed3);axls[pJP1.57]</i>                                      | J. Pellettieri thesis, 2004 | unstable |
| JH1580                               | <i>mbk-2(null)</i>                                                     | <i>unc-24(e1772) mbk-2(pk1427)/nT1</i>                                 | Pellettieri et al, 2003     |          |
| JH1866                               | <i>mbk-2(null);pie-1prom:GFP:MBK-2</i>                                 | <i>unc-24(e1772) mbk-2(pk1427)/nT1; unc-119(ed3);axls1140[pJP1.02]</i> | Pellettieri et al, 2003     |          |
| JH2301                               | <i>mbk-2(null);pie-1prom:GFP:MBK-2(S68A)</i>                           | <i>unc-24(e1772) mbk-2(pk1427)/nT1; unc-119(ed3);axls</i>              | this study                  |          |
| JH2302                               | <i>mbk-2(null);pie-1prom:GFP:MBK-2(S68E)</i>                           | <i>unc-24(e1772) mbk-2(pk1427)/nT1; unc-119(ed3);axls</i>              | this study                  |          |
| JH2385                               | <i>egg-3(deletion)(with Pharynx GFP balancer); pie-1prom:GFP:MEI-1</i> | <i>egg-3(tm1191)/mIn1[dpy-10(e128) mls14];orls1</i>                    | Stitzel et al., 2007        |          |
| JH2399                               | pie-1prom:3XFLAG:MBK-2:6XHis                                           | <i>unc-119(ed3);axls1813[pKC2.25]</i>                                  | Stitzel et al., 2007        | unstable |
| JH2585                               | pie-1prom:3XFLAG:MBK-2:6XHis(S68A)                                     | <i>unc-119(ed3);axls[pKC2.35]</i>                                      | this study                  |          |
| JH1859                               | pie-1prom:GFP:MBK-2(1-109)                                             | <i>unc-119(ed3);axls1859[pJP1.61]</i>                                  | J. Pellettieri thesis, 2004 |          |
